# Supplementary material for: Important challenges for coordination and inter-municipal cooperation in health care services: a Delphi study
Source: PubMed Central journal article supplement (PMC4228434; doi:10.1186/1472-6963-13-451), 2013-10-30
Supplement: 1472-6963-13-451-S1.pdf [file 1472-6963-13-451-S1.pdf]

**Additional file 1: Important challenges concerning coordination**

| <b>Category</b>                                                                                                    | <b>Challenge</b>                                                                                      | <b>Identified as important by the experts<br/>N=11</b> | <b>Identified as important by more than half of the experts</b> |
|--------------------------------------------------------------------------------------------------------------------|-------------------------------------------------------------------------------------------------------|--------------------------------------------------------|-----------------------------------------------------------------|
| <b>Education/<br/>qualification</b>                                                                                | Lack of competence on goal achievement.                                                               | 4                                                      |                                                                 |
|                                                                                                                    | Lack of/low coverage on required professional expertise/special skills.                               | 3                                                      |                                                                 |
|                                                                                                                    | Low workforce in municipal nursing and care sector.                                                   | 4                                                      |                                                                 |
|                                                                                                                    | Challenging to conduct skills development amongst employees to meet the new tasks.                    | 1                                                      |                                                                 |
|                                                                                                                    | Challenging to recruit and retain sufficient qualified personnel/ required skills.                    | 4                                                      |                                                                 |
|                                                                                                                    | One cannot meet new and more complicated patient/user situations.                                     | 1                                                      |                                                                 |
|                                                                                                                    | Challenging to teach employees about cooperative agreements and the implications on their work.       | 5                                                      |                                                                 |
|                                                                                                                    | Lack of knowledge in the organization concerning social planning as means of promoting public health. | 2                                                      |                                                                 |
|                                                                                                                    | Not enough expertise in the municipality concerning the coordination reform and new legislation.      | 1                                                      |                                                                 |
|                                                                                                                    | Managers and staff lack collaborative skills.                                                         | 3                                                      |                                                                 |
| Lack of interdisciplinary focus internally and externally on how to conduct the necessary competence enhancements. | 4                                                                                                     |                                                        |                                                                 |

|                              |                                                                                                                                                                    |   |   |
|------------------------------|--------------------------------------------------------------------------------------------------------------------------------------------------------------------|---|---|
| <b>Pressure on resources</b> | Services are under pressure due to limited resources.                                                                                                              | 4 |   |
|                              | Problems are transferred to other collaborating parts, one wishes that the "other" takes responsibility but does not understand that there are two equal partners. | 4 |   |
|                              | The reform is not fully funded for the municipalities.                                                                                                             | 8 | X |
|                              | Hard to invest and build new services.                                                                                                                             | 4 |   |
|                              | Scarce resources in terms of time, personnel and funding in the municipality.                                                                                      | 8 | X |
|                              | Collaboration is not carried out in a good and effective manner.                                                                                                   | 0 |   |
|                              | Political decisions concerning downsizing in health and social sector in front of the coordination reform.                                                         | 1 |   |
|                              | High level of employee turnover hinders the creation of good routines on evening, night and weekend shifts.                                                        | 0 |   |
| <b>Collaboration</b>         | All hospital employees do not relate to what has been decided related to collaboration with the municipality.                                                      | 4 |   |
|                              | Internal collaboration problems at hospitals.                                                                                                                      | 1 |   |
|                              | Changes and information comes faster than you are able to handle.                                                                                                  | 2 |   |
|                              | Lack of internal dialogue in the municipality.                                                                                                                     | 0 |   |
|                              | Divergent understanding and view of                                                                                                                                | 4 |   |

|                                            |                                                                                                                        |    |   |
|--------------------------------------------|------------------------------------------------------------------------------------------------------------------------|----|---|
|                                            | each other's tasks.                                                                                                    |    |   |
|                                            | It is not taken into account that some municipalities are large enough to handle the tasks themselves.                 | 2  |   |
|                                            | Inter-municipal cooperation is perceived as imposed upon.                                                              | 2  |   |
|                                            | Challenging to get everyone in own municipality to pull in one direction.                                              | 6  | X |
|                                            | Challenging to obtain information flow.                                                                                | 7  | X |
| <b>Cooperation with central government</b> | The government does not provide necessary and adequate information concerning tasks they impose on the municipality.   | 0  |   |
|                                            | Challenging to perform tasks that authorities demand before a given deadline. Changes come faster than one can manage. | 5  |   |
|                                            | Challenging to ensure that collaborating parties have the same understanding in a dialogue.                            | 5  |   |
|                                            | Uncertainty regarding what to do yourself and what you should collaborate on.                                          | 4  |   |
| <b>Electronic information exchange</b>     | Electronic messages are temporarily sent on epicrisis message format as a hybrid solution.                             | 0  |   |
|                                            | The hospitals have not prioritized the electronic messages supporting the process.                                     | 1  |   |
|                                            | Lack of electronic communication.                                                                                      | 10 | X |
|                                            | Lack of common tools for electronic communication, there is a problem with several suppliers.                          | 6  | X |

|                                                                       |                                                                                                                                                         |   |   |
|-----------------------------------------------------------------------|---------------------------------------------------------------------------------------------------------------------------------------------------------|---|---|
|                                                                       | Electronic messages represent a fragile system.                                                                                                         | 2 |   |
| <b>Relationship between the municipality / specialist health care</b> | Uncertainty exists in the support to municipalities from mobile specialist health care teams.                                                           | 3 |   |
|                                                                       | The hospitals do not go into dialogue with the municipality.                                                                                            | 2 |   |
|                                                                       | Unclear division of tasks.                                                                                                                              | 3 |   |
|                                                                       | Specialist health care want to relate to fewest partners possible, and expect municipalities and regions to emerge as one partner towards the hospital. | 4 |   |
|                                                                       | Lack of synchronization concerning the patients we "think" will be a municipal responsibility.                                                          | 5 |   |
|                                                                       | Discharge of patients is a challenge.                                                                                                                   | 2 |   |
|                                                                       | Hospital staff may have poor knowledge of contracts/reforms.                                                                                            | 7 | X |
|                                                                       | Patients being discharged are not prepared; information and documents relating to patients are missing when discharged from hospital.                   | 5 |   |
|                                                                       | Unrealistic dates are set for discharge of patient.                                                                                                     | 2 |   |
|                                                                       | Hospital staff are difficult to contact by telephone.                                                                                                   | 3 |   |
|                                                                       | The hospital sets the conditions for the process concerning discharge of patients.                                                                      | 6 | x |
|                                                                       | Patients are discharged earlier than before.                                                                                                            | 8 | X |
| Patients discharged are in worse                                      | MISSED                                                                                                                                                  |   |   |

|                      |                                                                                                                                                                     |   |   |
|----------------------|---------------------------------------------------------------------------------------------------------------------------------------------------------------------|---|---|
|                      | health condition than they used to.                                                                                                                                 |   |   |
|                      | The hospital shows no respect for the competence in the municipality.                                                                                               | 2 |   |
|                      | The specialist health service imposes changes that will directly affect the municipality, without involving the municipality in the process.                        | 4 |   |
|                      | Challenging to achieve a common understanding of the purpose of the reforms.                                                                                        | 4 |   |
|                      | Lack of understanding of each other's organizations.                                                                                                                | 5 |   |
|                      | The hospital does not ask what competence the municipalities possess.                                                                                               | 4 |   |
|                      | Specialist health care still has the power to define many situations. Instead of collaboration, the municipality is ordered on what services the patient must have. | 4 |   |
|                      | It is challenging to transfer knowledge from the specialist health care to the municipality.                                                                        | 2 |   |
| <b>Patient Focus</b> | Patient need is not well enough taken care of in specialist health care.                                                                                            | 1 |   |
|                      | Decisions about patient services are influenced by economic considerations rather than concern for patients.                                                        | 6 | X |
|                      | Employees' need for interesting tasks and permanent employment are more important than the patients' needs.                                                         | 1 |   |
|                      | Challenge to collaborate within the municipality with a focus on the best                                                                                           | 1 |   |

|                              |                                                                                                                                 |   |   |
|------------------------------|---------------------------------------------------------------------------------------------------------------------------------|---|---|
|                              | interests of the patient.                                                                                                       |   |   |
|                              | Challenging to ensure that right patients are admitted to the regional medical centre.                                          | 1 |   |
|                              | Lack of resources for day care, activities, social meeting place for people living at home, especially lonely elderly people.   | 7 | X |
|                              | Lack of focus on prevention.                                                                                                    | 7 | X |
|                              | Challenging to get municipalities and hospitals to adopt a common focus on prevention rather than treatment.                    | 4 |   |
| <b>Culture</b>               | Challenging to create a cultural change in the municipality, so that one can facilitate interdisciplinary collaboration.        | 2 |   |
|                              | GPs and the municipality base their views on different information.                                                             | 2 |   |
|                              | Specialist health service has focus on diagnosis and treatment, but the municipality has focused on coping and quality of life. | 8 | X |
|                              | Different cultures and different patient perspective in municipal and specialist health care services.                          | 7 | X |
|                              | Both politicians and the administration have a strong desire to "make do" in their own municipalities.                          | 7 | X |
|                              | Within the municipality there is a mismatch concerning what patient groups to prioritize.                                       | 1 |   |
| <b>Physical arrangements</b> | Challenging to get special assistive devices from technical aids centre in the municipality.                                    | 4 |   |

|                                                                                                 |   |   |
|-------------------------------------------------------------------------------------------------|---|---|
| Lack of or too few special assistive devices in internal stock.                                 | 5 |   |
| Challenging to obtain the necessary equipment and facilities to meet new patient-related tasks. | 6 | X |
