# Supplementary material for: Important challenges for coordination and inter-municipal cooperation in health care services: a Delphi study
Source: PubMed Central journal article supplement (PMC4228434; doi:10.1186/1472-6963-13-451), 2013-10-30
Supplement: 1472-6963-13-451-S2.pdf [file 1472-6963-13-451-S2.pdf]

**Additional file 2: Important challenges concerning inter-municipal collaboration**

| Category                       | Challenge                                                                                                                                                                                                                    | Identified as important by the experts. N=9 | Identified as important by more than half of the experts |
|--------------------------------|------------------------------------------------------------------------------------------------------------------------------------------------------------------------------------------------------------------------------|---------------------------------------------|----------------------------------------------------------|
| <b>Localization / Distance</b> | Larger distances between services and inhabitants' homes and local support system than if the offer was made in their own municipality.                                                                                      | <b>7</b>                                    | <b>X</b>                                                 |
|                                | Inconsistent use of the inter-municipal services.                                                                                                                                                                            | <b>1</b>                                    |                                                          |
|                                | It could become prestigious to localize the project in own district and closer to the clients. As a result, the choice of municipality to localize services is subject to political debate.                                  | <b>6</b>                                    | <b>X</b>                                                 |
|                                | Large geographic distances between municipalities.                                                                                                                                                                           | <b>1</b>                                    |                                                          |
| <b>Organizing</b>              | The largest of the cooperating municipalities must lead many of the processes. As a result, small municipalities claim they lose control and influence. Maintaining the interest of small municipalities can be challenging. | <b>3</b>                                    |                                                          |
|                                | Political leadership and management of inter-municipal work are demanding and require more than only organizing the municipal services.                                                                                      | <b>5</b>                                    | <b>X</b>                                                 |
|                                | Administrative challenges for the participating municipalities related to the economy and decision making.                                                                                                                   | <b>7</b>                                    | <b>X</b>                                                 |
|                                | Decisions on how to best organize inter-municipal work is challenging. There are different models with different advantages and                                                                                              | <b>6</b>                                    | <b>X</b>                                                 |

|                                                     |                                                                                                                                    |   |   |
|-----------------------------------------------------|------------------------------------------------------------------------------------------------------------------------------------|---|---|
|                                                     | disadvantages.                                                                                                                     |   |   |
|                                                     | Clear responsibilities and lines of authority can be challenging to establish.                                                     | 4 |   |
|                                                     | Municipalities are very different; it is often challenging to find common solutions.                                               | 3 |   |
|                                                     | Different organizing makes it hard to find the effective level of cooperation for the administration.                              | 2 |   |
| <b>Documentation Systems</b>                        | Challenging when someone needs to replace the documentation system.                                                                | 3 |   |
|                                                     | Various documentation systems that cannot be integrated.                                                                           | 6 | X |
|                                                     | Different understanding and different tools.                                                                                       | 4 |   |
|                                                     | Different basic data in IPLOS.                                                                                                     | 2 |   |
| <b>Economy</b>                                      | Inter-municipal work tends to be expensive, as no one "owns" it.                                                                   | 5 | X |
|                                                     | Challenging to agree on cost allocation, number of places and administration.                                                      | 6 | X |
| <b>Establishment of internal municipal services</b> | Challenging to find suitable areas for cooperation.                                                                                | 3 |   |
|                                                     | It can often be a long way from idea to decision.                                                                                  | 7 | X |
|                                                     | When considering inter-municipal work, most municipalities think "to the necessary extent" rather than to "the sufficient extent". | 4 |   |
|                                                     | It is challenging to establish inter-municipal cooperation as it is often more tempting to solve problems                          | 9 | X |

|                                           |                                                                                                                                                    |   |   |
|-------------------------------------------|----------------------------------------------------------------------------------------------------------------------------------------------------|---|---|
|                                           | alone since this is more flexible, it creates synergy, and expertise that can be applied across the municipality.                                  |   |   |
|                                           | Municipalities are lacking skills, ability to recruit and offer fragmented services.                                                               | 2 |   |
| <b>Interests / priorities</b>             | Partly different interests.                                                                                                                        | 5 | X |
| <b>Highlight inter-municipal services</b> | Challenging to distribute knowledge in the organization, and to anchor the joint cooperation projects at the local level.                          | 7 | X |
| <b>Staffing / Expertise</b>               | Challenges occur in the municipality when staffing levels decrease as a result of the work being resolved within the inter-municipal service.      | 4 |   |
|                                           | Professional environment/ challenges are "removed" from some municipalities and centralized. It can lead to impoverishment in some municipalities. | 5 | X |
