# Supplementary material for: Important challenges for coordination and inter-municipal cooperation in health care services: a Delphi study
Source: PubMed Central journal article supplement (PMC4228434; doi:10.1186/1472-6963-13-451), 2013-10-30
Supplement: 1472-6963-13-451-S3.pdf [file 1472-6963-13-451-S3.pdf]

**Additional file 3: Statements presented in round four**

| Q-1                                                                                                                                    | Q-2                                                                                                                                                                                            |
|----------------------------------------------------------------------------------------------------------------------------------------|------------------------------------------------------------------------------------------------------------------------------------------------------------------------------------------------|
| 1. Challenging to obtain the necessary equipment and facilities to meet new patient-related tasks.                                     | 1. Larger distances between services and inhabitants' homes and local support system than if the offer was made in their own municipality.                                                     |
| 2. Politicians have a strong desire to "make do" in their own municipalities.                                                          | 2. It could become prestigious to localize the project in own district and closer to the clients. As a result, the choice of municipality to localize services is subject to political debate. |
| 3. Different culture in municipal and specialist health care services.                                                                 | 3. Political leadership and management of inter-municipal work are demanding and require more than only organizing the municipal services.                                                     |
| 4. Specialist health service has focus on diagnosis and treatment, but the municipality has focused on coping and quality of life.     | 4. Administrative challenge for the participating municipalities related to the economy and decision making.                                                                                   |
| 5. Lack of focus on prevention.                                                                                                        | 5. Decisions on how to best organize inter-municipal work is challenging. There are different models with different advantages and disadvantages.                                              |
| 6. Lack of resources for day care (e.g. activities, social meeting place for people living at home, especially lonely elderly people). | 6. Various documentation systems that cannot be integrated.                                                                                                                                    |
| 7. Decisions concerning patient services are                                                                                           | 7. Inter-municipal work tends to be expensive, as                                                                                                                                              |

|                                                                                        |                                                                                                                                                                                                                                 |
|----------------------------------------------------------------------------------------|---------------------------------------------------------------------------------------------------------------------------------------------------------------------------------------------------------------------------------|
| influenced by economic considerations rather than concern for patients.                | no one "owns" it.                                                                                                                                                                                                               |
| 8. Hospital staff may have poor knowledge of contracts / reforms.                      | 8. Challenging to agree on cost allocation.                                                                                                                                                                                     |
| 9. Lack of electronic communication.                                                   | 9. It can often be a long way from idea to decision.                                                                                                                                                                            |
| 10. Lack of common tools for electronic communication.                                 | 10. It is challenging to establish inter-municipal cooperation as it is often more tempting to solve problems alone since this is more flexible, it creates synergy, and expertise that can be applied across the municipality. |
| 11. Patients are discharged earlier than before.                                       | 11. Partly different interests.                                                                                                                                                                                                 |
| 12. The hospital sets the conditions for the process concerning discharge of patients. | 12. Challenging to anchor the joint cooperation projects at the local level.                                                                                                                                                    |
| 13. The reform is not fully funded for the municipalities.                             | 13. Professional environment/ challenges are "removed" from some municipalities and centralized. It can lead to impoverishment in some municipalities.                                                                          |
| 14. Scarce resources in terms of time.                                                 | 14. Administrative challenge for the participating municipalities related to the decision making.                                                                                                                               |
| 15. Challenging to get everyone in own municipality to pull in one direction.          | 15. Challenging to distribute knowledge about joint cooperation projects in the organization.                                                                                                                                   |
| 16. Challenging to obtain information flow.                                            | 16. Challenging to agree on number of places.                                                                                                                                                                                   |
| 17. Different patient perspective in municipal and specialist health care services.    | 17. Challenging to agree on administration.                                                                                                                                                                                     |

|                                                                                                                                                 |  |
|-------------------------------------------------------------------------------------------------------------------------------------------------|--|
| 18. Scarce resources in terms of personnel.                                                                                                     |  |
| 19. Scarce resources in terms of funding.                                                                                                       |  |
| 20. The administration has a strong desire to "make do" in their own municipality                                                               |  |
| 21. Patients discharged are in worse health condition than they used to.<br>(Was only to be rated, if they would have chosen it in round three) |  |
